# Supplementary material for: The intersectional effect of poverty, home ownership, and racial/ethnic composition on mean childhood blood lead levels in Milwaukee County neighborhoods
Source: PLOS journal article supplement (doi:10.1371/journal.pone.0234995), 2020-06-19
Supplement: S1 (10.1371/journal.pone.0234995.s001) [file journal.pone.0234995.s001]

|                                                        |                                        | “Elevated”                                                        | “Not Elevated”                                                    |                      |
|--------------------------------------------------------|----------------------------------------|-------------------------------------------------------------------|-------------------------------------------------------------------|----------------------|
|                                                        |                                        | Census tracts with mean<br>childhood blood lead<br>level ≥ 5µg/dL | Census tracts with mean<br>childhood blood lead<br>level < 5µg/dL |                      |
|                                                        |                                        | N=60                                                              | N=155                                                             |                      |
| Census Tract-Level Average <sup>a</sup>                |                                        |                                                                   |                                                                   | p-value <sup>b</sup> |
| Wisconsin Surveillance Data                            |                                        |                                                                   |                                                                   |                      |
| Sex of Children Tested                                 |                                        |                                                                   |                                                                   |                      |
|                                                        | Female                                 | 49.15%                                                            | 48.84%                                                            | 0.7130               |
|                                                        | Male                                   | 50.82%                                                            | 51.09%                                                            | 0.7130               |
|                                                        | Unknown                                | 0.03%                                                             | 0.07%                                                             |                      |
| Age of Children Tested (in years)                      |                                        | 2.58 (0.12)                                                       | 2.19 (0.36)                                                       | <0.0001              |
| Race/Ethnicity of Children Tested                      |                                        |                                                                   |                                                                   |                      |
|                                                        | White                                  | 2.75%                                                             | 24.62%                                                            | <0.0001              |
|                                                        | Black                                  | 69.52%                                                            | 34.02%                                                            | <0.0001              |
|                                                        | Hispanic                               | 17.30%                                                            | 22.84%                                                            | 0.0064               |
|                                                        | Other <sup>c</sup>                     | 4.56%                                                             | 6.73%                                                             | <0.0001              |
|                                                        | Unknown                                | 5.88%                                                             | 11.79%                                                            | <0.0001              |
| Lead Test Sample Year                                  |                                        |                                                                   |                                                                   |                      |
|                                                        | 2014                                   | 47.15%                                                            | 48.33%                                                            | 0.1391               |
|                                                        | 2015                                   | 28.73%                                                            | 29.94%                                                            | 0.0868               |
|                                                        | 2016                                   | 24.11%                                                            | 21.73%                                                            | <0.0001              |
| Lead Test Sample Type                                  |                                        |                                                                   |                                                                   |                      |
|                                                        | Capillary                              | 66.35%                                                            | 68.44%                                                            | 0.0840               |
|                                                        | Venous                                 | 32.77%                                                            | 30.65%                                                            | 0.0808               |
|                                                        | Unknown                                | 0.87%                                                             | 0.92%                                                             | 0.8116               |
| 2012 - 2016 American Community Survey 5-Year Estimates |                                        |                                                                   |                                                                   |                      |
| Race/Ethnicity                                         |                                        |                                                                   |                                                                   |                      |
|                                                        | Non-Hispanic White                     | 10.77%                                                            | 46.18%                                                            | <0.0001              |
|                                                        | Non-Hispanic Black or African American | 67.16%                                                            | 29.74%                                                            | <0.0001              |
|                                                        | Hispanic or Latino                     | 15.34%                                                            | 17.26%                                                            | 0.0191               |
|                                                        | Other <sup>d</sup>                     | 6.66%                                                             | 6.79%                                                             | 0.0191               |
| Families Living Below the Federal Poverty Level        |                                        | 40.84%                                                            | 19.37%                                                            | <0.0001              |
| Housing Tenure                                         |                                        |                                                                   |                                                                   |                      |
|                                                        | Owner Occupied Housing                 | 28.87%                                                            | 45.97%                                                            | <0.0001              |
|                                                        | Renter Occupied Housing                | 71.13%                                                            | 54.03%                                                            | <0.0001              |
| Educational Attainment                                 |                                        |                                                                   |                                                                   |                      |
|                                                        | Less than HS Diploma <sup>e</sup>      | 26.73%                                                            | 15.03%                                                            | <0.0001              |
|                                                        | HS Diploma/GED/equivalent <sup>f</sup> | 33.48%                                                            | 28.28%                                                            | 0.0002               |
|                                                        | Beyond HS Diploma <sup>g</sup>         | 39.80%                                                            | 56.69%                                                            | <0.0001              |
| Housing Age                                            |                                        |                                                                   |                                                                   |                      |
|                                                        | Built Before 1950                      | 73.50%                                                            | 43.66%                                                            | <0.0001              |
|                                                        | Built 1950 or After                    | 26.50%                                                            | 56.34%                                                            | <0.0001              |

<sup>a</sup>Census Tract-Level Averages: Census tract-level distributions were averaged across all census tracts to generate the average percent or mean value

<sup>b</sup>P-value of two-tailed t-test or Wilcoxon two-sample tests, depending on the distribution

<sup>c</sup>Includes American Indian/Alaska Native, Asian, Hawaiian/pacific islander, Multiple races, and other

<sup>d</sup>Includes Non- Hispanic Asian, Non-Hispanic American Indian/Alaska Native, and Non-Hispanic, 2 or more races/ other race

<sup>e</sup>Includes estimates for population 25 years and older with no schooling, nursery school, kindergarten, and grade 1 -12 but no high school diploma

<sup>f</sup>Includes estimates for population 25 years and older with a high school diploma or GED or equivalent

<sup>g</sup>Includes estimates for population 25 years and older with some college/less than 1 year, some college/1 or more years no degree, Associate's degree, Bachelor's degree, Master's degree, Professional school degree, or Doctorate degree
